1 **Title:** Using Latent Class Analysis to Identify Subgroups of Post-Operative Older Adults

2 **Authors:**

3 Kevin McLaughlin, DPT; Johns Hopkins University School of Medicine, Department of  
4 Physical Medicine and Rehabilitation

5 Amie Bettencourt, PhD; Johns Hopkins University School of Medicine, Department of  
6 Psychiatry and Behavioral Sciences

7 Daniel Young, DPT, PhD, University of Nevada Las Vegas, Department of Physical  
8 Therapy

9 Erik Hoyer, MD; Johns Hopkins University School of Medicine, Department of Physical  
10 Medicine and Rehabilitation

11 Michael Friedman, PT, MBA; Johns Hopkins University School of Medicine, Department  
12 of Physical Medicine and Rehabilitation

13 Elizabeth Colantuoni, PhD; Johns Hopkins Bloomberg School of Public Health,  
14 Department of Biostatistics

15 Lee A. Goeddel, MD, MPH; Johns Hopkins University School of Medicine, Department  
16 of Anesthesiology and Critical Care Medicine

17 Pedro Gozalo, PhD; Brown University School of Public Health, Department of Health  
18 Services, Policy and Practice

19

20 **Correspondence and Reprints:**

21 Kevin McLaughlin

22 600 N. Wolfe Street

23 Baltimore, MD 21287

24 [Kevin.mclaughlin@jhmi.edu](mailto:Kevin.mclaughlin@jhmi.edu)

25

26 Abstract word count: 252

27 Main text word count: 2,790

28

29 Funding Statement: Funding for this study was provided by the Learning Health

30 Systems Rehabilitation Research Network (LeaRRn) (NIH 5P2CHD101895-03)

31 **Abstract**

32 Objective: Identify subgroups of postoperative older adults using electronic health record data.

33 Summary of Background Data: Postoperative older adults represent a vulnerable population  
34 who may benefit from tailored postoperative care pathways. Identifying clinical subgroups can  
35 inform the development of these pathways.

36 Methods: Retrospective cohort study of postoperative adults  $\geq 65$  years (N=2,036) from a single  
37 healthcare system. Latent class analysis was used to identify patient subgroups based on  
38 measures of frailty, mobility, activities of daily living, and general health status. Hospital  
39 outcomes were described among each subgroup, including extended lengths of stay (LOS)  
40 ( $>0.5$  SD beyond mean LOS by surgical category), discharge disposition (i.e., home versus non-  
41 home discharge), and utilization (weekly visit frequency) of physical therapy (PT) and  
42 occupational therapy (OT).

43 Results: We identified 3 subgroups that we labeled Low Frailty-High Mobility (LF-HM), High  
44 Frailty-Low Mobility (HF-LM), and Low Frailty-Low Mobility (LF-LM), representing 15.3%, 27.6%,  
45 and 57.1% of the cohort, respectively. Discharge to home was highest among the LF-HM group  
46 (99%), followed by LF-LM (96%), and HF-LM (77%). Extended LOS was most common among  
47 the HF-LM group (27%), followed by LF-LM (18%), and LF-HM (6%). PT and OT visit  
48 frequencies were highest in the HF-LM group followed by the LF-LM and LF-HM groups.

49 Conclusions: This study identified 3 subgroups of postoperative older adults using routinely  
50 collected patient data. These groups may help to identify patients with increased odds of non-  
51 home discharge, extended LOS, and higher utilization of PT and OT and may inform the  
52 development of tailored postoperative care pathways for older adults.

## 53 Introduction

54 More than half of the 20 million surgeries performed each year in the US are for adults  
55 who will require an inpatient hospital stay.<sup>1</sup> Among these, older adults are at increased  
56 risk for extended hospital lengths of stay (LOS) and discharge to post-acute care  
57 facilities,<sup>2-7</sup> which conflict with patient preferences and contribute to increased cost of  
58 care.<sup>8-10</sup> Enhanced recovery after surgery (ERAS) pathways have been shown to  
59 improve clinical outcomes among post-operative older adults.<sup>11-15</sup> However, ERAS  
60 pathways typically include additional interventions or services (e.g., medication  
61 rehabilitation services), with associated costs, and not all patients are equally likely to  
62 benefit from these services. There is a need to better identify older adult patients at risk  
63 of poor post-operative outcomes to better target resources and tailor postoperative care  
64 pathways to the needs of individual patients.

65 Previous studies have identified individual patient-level factors associated with post-  
66 operative outcomes. For example, studies have found that pre-operative frailty is  
67 associated with increased risk for loss of independence following surgery, as well as  
68 longer LOS, among older adults.<sup>7,16</sup> Another study found that patients with lower levels  
69 of mobility one day after gastrointestinal surgery were more likely to experience an  
70 extended LOS.<sup>17</sup> Additional studies have observed associations between age, gender,  
71 body mass index, pre-operative function and American Society of Anesthesiologists  
72 (ASA) rating with post-operative outcomes following surgery.<sup>2,6,18,19</sup> However, few  
73 studies have examined preoperative and postoperative patient data in combination,  
74 which is likely to account for variability in patient outcomes better than preoperative or  
75 postoperative data alone.

76 Latent class analysis is a statistical approach that is increasingly being used to identify  
77 subgroups of patients within heterogenous clinical populations who have similar  
78 patterns of clinical outcome techniques.<sup>20–23</sup> Identifying subgroups in this manner is  
79 commonly used to inform the development of tailored or “precision” treatment  
80 approaches.<sup>20,23–26</sup> The purpose of this study was to identify subgroups of post-  
81 operative older adults using a latent class analysis of routinely collected patient-level  
82 data from a large academic health care system. We also examined differences in key  
83 post-operative outcomes among those in each of the identified latent subgroups.

84

## 85 **Methods**

86 We utilized a retrospective cohort design to identify latent subgroups of older adults  
87 admitted to the hospital following surgery and to examine differences in hospital  
88 outcomes among those in each latent subgroup. Data for this study were collected  
89 during routine care encounters and extracted from the electronic health record (EHR)  
90 for analysis.

91

### 92 *Patient Cohort*

93 We included older adults ( $\geq 65$ ) hospitalized at Johns Hopkins Hospital or Johns Hopkins  
94 Bayview Medical Center following inpatient surgery between September 2016 and  
95 March 2020. Eligible patients included those having any of the following surgical  
96 procedures: abdominal surgery, gynecologic surgery, pancreatic surgery, head & neck  
97 surgery, neurosurgery, orthopaedic surgery, plastic surgery, spine surgery, thoracic

98 surgery, urologic surgery, or vascular surgery. Individuals undergoing outpatient surgery  
99 were not included in our cohort.

100

### 101 *Latent Class Indicators*

102 Based on previous evidence and standard data collection practices at our institution, we  
103 utilized patient age, general health status, frailty, mobility, and activities of daily living to  
104 identify latent subgroups of older adults after surgery.<sup>2,6,7,16-19</sup> General health status was  
105 measured prior to surgery by the anesthesiology team using the American Society of  
106 Anesthesiologists Physical Status Classification System (ASA PS Classification), a  
107 method used to succinctly assess and communicate patients' pre-anesthesia medical  
108 comorbidities.<sup>27</sup> ASA PS Classification scores range from 1 (normal health patient) to 6  
109 (brain-dead). Frailty was measured at pre-operative appointments by nursing using the  
110 Edmonton Frail Scale (EFS), a valid and reliable measure of frailty with scores ranging  
111 from 0-17 and higher scores indicative of greater frailty.<sup>28,29</sup> Patient mobility function  
112 was assessed using the Activity Measure for Post-Acute Care (AM-PAC) Inpatient  
113 Basic Mobility "6-Clicks" Short Form.<sup>30,31</sup> Patient function in activities of daily living was  
114 measured using the AM-PAC Inpatient Daily Activity "6-Clicks" Short Form. Both AM-  
115 PAC short forms include 6 items scored by clinicians on a scale of 1-4 with lower scores  
116 indicating greater impairment. Raw scores were converted to t-scores and used in all  
117 analyses; these t-scores range from 16.6 to 57.7.<sup>32</sup> In our hospitals, AM-PAC short  
118 forms are scored daily by nursing and at all PT visits (mobility short form) and OT visits  
119 (daily activity short form). Previous studies have shown high interrater reliability across  
120 and within disciplines for these measures.<sup>33,34</sup> We utilized the first observed AM-PAC

121 mobility and daily activity scores recorded by either discipline following surgery for  
122 analysis.

### 123 *Hospital Outcomes*

124 Hospital outcomes for this study included LOS, discharge disposition, and utilization of  
125 physical therapy (PT) and occupational therapy (OT) services. LOS was categorized as  
126 an extended LOS, defined as a LOS (days) that was  $\geq 0.5$  standard deviations above the  
127 mean LOS for each surgical category, or a non-extended LOS, defined as any LOS less  
128 than the extended LOS definition. Discharge disposition was categorized as home  
129 discharge or non-home discharge (e.g., skilled nursing facility, inpatient rehabilitation  
130 facility). PT and OT utilization were examined separately based on weekly visit  
131 frequency, which was identified based on the number of PT or OT visits received,  
132 divided by patients' LOS, and multiplied by 7.

133

### 134 *Analysis*

135 Descriptive statistics were used to describe the sample. LCA was used to identify  
136 classes based on the continuous variables: age, AM-PAC mobility and AM-PAC daily  
137 activity scores, and dichotomized variables: ASA ratings, EFS total score, and individual  
138 EFS items (i.e., general health status, functional dependence, functional performance).  
139 ASA ratings were dichotomized to those patients who were healthy or with mild  
140 systemic disease (i.e., scores of 1-2) or patients with severe disease (i.e., scores of 3  
141 and above). The general health status item on the EFS was dichotomized to those  
142 patients in good to excellent health or patients in fair to poor health. The functional

143 dependence criterion of the EFS was dichotomized to those who required help in 0-1  
144 activities or those who required help in 2 or more activities. The functional performance  
145 criterion of the EFS was dichotomized to those who completed the timed up and go test  
146 in 0-10 seconds or for those who completed it in 11 or more seconds. All LCA models  
147 were estimated using Mplus, Version 8.6.<sup>35</sup> Fit statistics, classification accuracy and  
148 relative class size were considered in selecting the best fitting latent class model.

149 Model fit was measured using the Bayesian information criterion (BIC) and the sample  
150 size-adjusted BIC (aBIC).<sup>36</sup> For the BIC and aBIC, smaller values indicate better model  
151 fit. The Vuong-Lo-Mendell-Rubin Likelihood Ratio Test (VLMR-LRT) was used to  
152 compare the relative fit of a model with  $k$  classes to a model with one fewer class.  
153 Significant  $p$  values for the VLMR-LRT indicate that the latent class solution with fewer  
154 classes should be rejected in support of the solution with more classes.<sup>36</sup> Entropy,  
155 ranging from 0 to 1, was also examined with larger values indicating better classification  
156 accuracy. Finally, class sizes were examined for each solution as simulation studies  
157 indicate that small or uncommon classes can be difficult to identify reliably and it is  
158 important to avoid over extracting classes.<sup>36</sup>

159 Once the unconditional latent class model was established, we used multinomial logistic  
160 regression to examine class differences in two dichotomous (i.e., discharge disposition,  
161 extended length of stay) and two continuous hospital outcomes (i.e., PT and OT weekly  
162 frequencies).

163 Next, the auxiliary function with Bolck, Croon and Hagenaars (BCH) weights was used  
164 to examine differences in the prevalence of these outcomes across classes. In the BCH  
165 approach, weights were applied to individual participants based on their posterior



166 probabilities of class membership and an overall test of equality as well as pairwise  
167 tests of prevalence differences across classes using one degree of freedom were  
168 conducted.<sup>35,37</sup>

169

### 170 *Ethical Statement*

171 This study was acknowledged as exempt by the Johns Hopkins Medicine Institutional  
172 Review Board (IRB00337243). Data were collected for all participants under a waiver of  
173 consent.

174

### 175 **Results**

176 We identified 2,036 older adults ( $\geq 65$ ) hospitalized after eligible surgical procedures  
177 between September 2016 and March 2022. Our cohort was 45% female and the  
178 majority of patients were White (76.6%) or Black (16.1%). The average length of stay  
179 among included patients was 4.4 days (SD: 4.4). Length of stay varied by surgical  
180 category, from 2.8 days (SD: 3.3) in urologic surgery to 8.5 days (SD: 5.7) in  
181 pancreatic/hepatobiliary surgery. The most common surgical categories were abdominal  
182 surgery (21.2%) and urologic surgery (20.3%) (Table 1).

183 For our LCA, comparison of the fit statistics, classification quality, and class size for  
184 solutions specifying one to eight classes suggested several reasonable models (see  
185 Table 2). Although the eight-class model had the lowest BIC and aBIC values, the scree  
186 plot indicated that minimal benefit of extending the model beyond five- or six- classes

187 (visualized as the line flattening between the models with five or six classes indicating  
188 minimal decrease in BIC and aBIC for models with more than 6 classes). The VLMR  
189 indicated that a four-class model fit the data better than a three-class model and a five-  
190 class model fit better than a four-class model but adding a sixth class did not improve  
191 model fit. However, the smallest class in the four-class model included only 2-3% of the  
192 sample (33-57 people) suggesting that these patients were outliers on each of the  
193 measures, and not a particularly clinically meaningful class. Based on all of these  
194 considerations, we selected the three-class model as the best fitting model and further  
195 analyses focused on that solution.

196 Based on the characteristics of the members of each of the identified classes, we  
197 labeled the 3 identified classes as the Low Frailty-High Mobility (LF-HM) class (15.3%),  
198 the High Frailty-Low Mobility (HF-LM) class (27.6%), and the Low Frailty-Low Mobility  
199 (LF-LM) class (57.1%) (Table 3). Age was similar between the LF-HM and LF-LM  
200 classes (71.6 and 72.5 years, respectively), but was higher in the HF-LM class (75.0  
201 years). Frailty scores were similar in the LF-HM class (2.6) and LF-LM class (2.2) but  
202 were notably higher among those in the HF-LM class. Mean AM-PAC mobility scores  
203 were highest in the LF-HM class (54.2), followed by the LF-LM class (41.6), and HF-LM  
204 class (37.7). AM-PAC daily activity scores followed a similar pattern with mean scores  
205 of 54.8, 40.7, and 37.5 in the LF-HM, LF-LM, and HF-LM classes, respectively. ASA  
206 also differed by class with the HF-LM class having the highest probability (0.87) of  
207 receiving an ASA rating of 3 or higher and the LF-HM and LF-LM having similar but  
208 lower probabilities of receiving an ASA rating of 3 or higher (0.64 and 0.67,  
209 respectively). Individual EFS items also differed by class. Specifically, individuals in the

210 HF-LM had a much higher probability of having fair to poor health status, being  
211 functionally dependent, and requiring more than 10 seconds to complete the up and go  
212 test as compared to the LF-HM and LF-LM classes.

213 Class membership varied by surgical category (Figure 1). For example, the LF-HM  
214 class was most represented among those undergoing head & neck surgery (32%) and  
215 was least represented among those undergoing hepatobiliary/pancreatic surgery (2%).  
216 The HF-LM class was most represented among those undergoing vascular surgery  
217 (50%) and least represented by those undergoing urologic surgery (12%). Finally, the  
218 LF-LM class was most represented by those undergoing hepatobiliary/pancreatic  
219 surgery (69%) and least among those undergoing plastic surgery (38%).

220 All hospital outcomes of interest were significantly different by class ( $p < 0.001$ ) (Table 3).  
221 The proportion of those discharged home was 99% in the LF-HM class, 96% in the LF-  
222 LM class, and 77% in the HF-LM class. We observed that the percentage of patients  
223 experiencing an extended LOS was highest in the HF-LM class (27%), followed by the  
224 LF-LM class (18%), and the LF-HM class (6%). PT and OT visit frequencies were  
225 highest in HF-LM class (PT: 2.1 visits/week; OT: 1.1 visits/week), followed by the LF-LM  
226 class (PT: 1.2 visits/week; OT: 0.5 visit/week), and the LF-HM class (PT: 0.3  
227 visits/week; OT: 0.1 visits/week).

228

## 229 **Discussion**

230 The results of this study indicate that LCA may be a useful approach for identifying  
231 latent subgroups of post-operative older adults, a large patient population vulnerable to

232 poor outcomes. We specifically identified three latent subgroups of post-operative older  
233 adults, which we have labeled as Low Frailty-High Mobility (LF-HM) (15.3%), High  
234 Frailty-Low Mobility (HF-LM) (27.6%), and Low-Frailty-Low Mobility (LF-LM) (57.1%).  
235 These subgroups were present within each of the included surgical categories, although  
236 the proportion of patients belonging to each subgroup varied by type of surgery.  
237 Furthermore, patients in each subgroup differed significantly from one another in  
238 discharge disposition, LOS, and utilization of PT and OT services.

239 The classes identified in this study align with clinical reasoning and highlight the  
240 importance of physical function in the International Classification of Functioning,  
241 Disability and Health (ICF) domains of mobility and self-care (activities of daily living).<sup>38</sup>  
242 It was not surprising to us that our analysis identified a subgroup of patients (HF-LM)  
243 with poorer general health, higher frailty scores, and lower physical function and that  
244 these patients were more commonly discharged to post-acute care and experienced  
245 higher rates of extended LOS. Likewise, it stands to reason that our analysis identified  
246 another class of patients (LF-HM) that were generally healthy, had low frailty scores,  
247 had high mobility and daily activity function scores, were nearly always discharged  
248 home and rarely experienced an extended LOS. However, less expected was the  
249 identification of the LF-LM class, which is similar to the LF-HM group for all class  
250 identifiers, with the exception of AM-PAC scores which are both lower in the LF-LM  
251 class compared to the LF-HM class. Despite only this difference between groups, the  
252 LF-LM class experienced extended LOS rates 3 times higher and utilized 4-5 times as  
253 many PT and OT visits per week compared to the LF-HM class. These findings align  
254 with previous studies that have highlighted the influence of patient mobility and daily

255 activity function on hospital outcomes and the importance of measuring these items as  
256 part of routine care.<sup>17,39–41</sup>

257 The findings of this study may be useful for the development of tailored postoperative  
258 pathways that facilitate more efficient use of hospital services and increase the overall  
259 value of postoperative care. For example, we observed that 99% of those in the LF-HM  
260 class were discharged home and only 6% experienced extended LOS. On the other  
261 hand, those in the HF-LM class were discharged home only 77% of the time and 27% of  
262 these patients experienced an extended LOS. In this scenario, it could be argued that  
263 services such as PT and OT consults provided to those in the HF-LM class are of  
264 greater value, given these patients are at greater risk of undesired outcomes. Similar  
265 concepts have been proposed using AM-PAC scores alone, which were shown to have  
266 the potential to reduce low-value PT and OT consults among patients admitted to the  
267 hospital for medical diagnoses.<sup>42</sup> This study expands on this approach by examining the  
268 influence of multiple patient factors on key outcomes and by identifying patient  
269 subgroups that can inform tailored postoperative care pathways.

270 The classes identified in this study, while corresponding to one institution, are likely  
271 generalizable to other institutions performing surgery among older adults seeking to  
272 identify clinical subgroups. Importantly, this study was conducted exclusively using  
273 routinely collected data extracted from the EHR. While this increases the overall  
274 feasibility of the study performed, it does place additional emphasis on the identification  
275 and selection of clinical measures, as well as systematic collection and documentation  
276 of these measures. Previous publications can provide guidance on the process of

277 selecting outcome measures for healthcare systems seeking to implement or refine data  
278 collection strategies.<sup>43,44</sup>

279 Strengths of this study include a large patient sample that have undergone a wide  
280 variety of surgical procedures. This study also utilized data elements that are routinely  
281 collected at many hospitals, increasing the generalizability of our results. There are also  
282 limitations to this study that should be considered when interpreting results. It is likely  
283 that there are factors not measured routinely in our healthcare system that would have  
284 altered the subgroups identified in this study had they been included in our analysis. For  
285 example, social determinants of health and mental health (i.e., depression) have been  
286 shown to influence LOS and discharge disposition among hospitalized patients and may  
287 have altered the composition of the classes we identified.<sup>45-49</sup> Our analysis was also  
288 performed specifically among older adults after surgery and it is possible that this  
289 affects the generalizability of our results to other populations, such as postoperative  
290 adults under 65 years of age.

### 291 *Conclusion*

292 We identified three clinically relevant subgroups of postoperative older adults based on  
293 data routinely collected in the EHR. We observed significant differences in the  
294 proportion of patients discharged to home, the proportion with extended LOS, and  
295 utilization of PT and OT services between each of the groups. The design and results of  
296 this study may inform the development of more patient-centered care pathways after  
297 surgery that maximize patient outcomes and thus the value of postoperative hospital  
298 services.

299 **Author Contributions**

300 KM wrote the primary manuscript draft. AB led the analysis of study data. EH and LG  
301 assisted with extraction of clinical data from the medical record. All authors contributed  
302 to idea development, provided manuscript revisions, and approved of the final  
303 manuscript.

304

305 **Funding Information**

306 Funding for this study was provided by the Learning Health Systems Rehabilitation  
307 Research Network (LeaRRn) (NIH 5P2CHD101895-03)

308

309 **Conflict of Interest Statement**

310 The authors have no financial or personal conflicts to disclose.

311

312 **Sponsor's Role**

313 The sponsor had no role in the design of the study, data acquisition, analysis,  
314 interpretation of results, or writing of the manuscript.

315

316 **References**

- 317 1. Inpatient vs. Outpatient Surgeries. Accessed October 5, 2021.  
318 <http://www.ahrq.gov/data/infographics/outpatient-surgery.html>
- 319 2. Collins TC, Daley J, Henderson WH, Khuri SF. Risk Factors for Prolonged Length of  
320 Stay After Major Elective Surgery. *Ann Surg.* 1999;230(2):251.
- 321 3. Clark DE, Ryan LM. Concurrent Prediction of Hospital Mortality and Length of Stay  
322 from Risk Factors on Admission. *Health Services Research.* 2002;37(3):631-645.  
323 doi:10.1111/1475-6773.00041
- 324 4. Cleveland Clinic Orthopaedic Arthroplasty Group. The Main Predictors of Length of  
325 Stay After Total Knee Arthroplasty: Patient-Related or Procedure-Related Risk  
326 Factors. *JBJS.* 2019;101(12):1093-1101. doi:10.2106/JBJS.18.00758
- 327 5. Karhade AV, Ogink PT, Thio QCBS, et al. Discharge Disposition After Anterior  
328 Cervical Discectomy and Fusion. *World Neurosurgery.* 2019;132:e14-e20.  
329 doi:10.1016/j.wneu.2019.09.026
- 330 6. Al-Mazrou AM, Chiuzan C, Kiran RP. Factors influencing discharge disposition after  
331 colectomy. *Surg Endosc.* 2018;32(7):3032-3040. doi:10.1007/s00464-017-6013-z
- 332 7. Goeddel LA, Murphy Z, Owodunni O, et al. Domains of Frailty Predict Loss of  
333 Independence in Older Adults After Noncardiac Surgery. *Annals of Surgery.*  
334 2023;278(2):e226. doi:10.1097/SLA.0000000000005720
- 335 8. Henry L, Halpin L, Hunt S, Holmes SD, Ad N. Patient disposition and long-term  
336 outcomes after valve surgery in octogenarians. *Ann Thorac Surg.* 2012;94(3):744-  
337 750. doi:10.1016/j.athoracsur.2012.04.073
- 338 9. Lala A, Chang HL, Liu X, et al. Risk for non-home discharge following surgery for  
339 ischemic mitral valve disease. *J Thorac Cardiovasc Surg.* Published online March 4,  
340 2020:S0022-5223(20)30524-9. doi:10.1016/j.jtcvs.2020.02.084
- 341 10. Okoh AK, Haik N, Singh S, et al. Discharge disposition of older patients  
342 undergoing trans-catheter aortic valve replacement and its impact on survival.  
343 *Catheter Cardiovasc Interv.* 2019;94(3):448-455. doi:10.1002/ccd.28069
- 344 11. Ljungqvist O, Scott M, Fearon KC. Enhanced Recovery After Surgery: A Review.  
345 *JAMA Surg.* 2017;152(3):292-298. doi:10.1001/jamasurg.2016.4952
- 346 12. Baxter R, Squiers J, Conner W, et al. Enhanced Recovery After Surgery: A  
347 Narrative Review of its Application in Cardiac Surgery. *Ann Thorac Surg.* Published  
348 online December 23, 2019. doi:10.1016/j.athoracsur.2019.11.008



- 349 13. Lirosi MC, Tirelli F, Biondi A, et al. Enhanced Recovery Program for Colorectal  
350 Surgery: a Focus on Elderly Patients Over 75 Years Old. *J Gastrointest Surg.*  
351 2019;23(3):587-594. doi:10.1007/s11605-018-3943-2
- 352 14. Tan P, Huo M, Zhou X, Zhao B. The safety and effectiveness of enhanced  
353 recovery after surgery (ERAS) in older patients undergoing orthopedic surgery: a  
354 systematic review and meta-analysis. *Arch Orthop Trauma Surg.* 2023;143(11):6535-  
355 6545. doi:10.1007/s00402-023-04963-2
- 356 15. Tong Y, Fernandez L, Bendo JA, Spivak JM. Enhanced Recovery After Surgery  
357 Trends in Adult Spine Surgery: A Systematic Review. *International Journal of Spine*  
358 *Surgery.* 2020;14(4):623-640. doi:10.14444/7083
- 359 16. Mrdutt MM, Papaconstantinou HT, Robinson BD, Bird ET, Isbell CL. Preoperative  
360 Frailty and Surgical Outcomes Across Diverse Surgical Subspecialties in a Large  
361 Health Care System. *Journal of the American College of Surgeons.* 2019;228(4):482-  
362 490. doi:10.1016/j.jamcollsurg.2018.12.036
- 363 17. Carroll GM, Hampton J, Carroll R, Smith SR. Mobility scores as a predictor of  
364 length of stay in general surgery: a prospective cohort study. *ANZ Journal of Surgery.*  
365 2018;88(9):860-864. doi:10.1111/ans.14555
- 366 18. Chen Y, Scholten A, Chomsky-Higgins K, et al. Risk Factors Associated With  
367 Perioperative Complications and Prolonged Length of Stay After Laparoscopic  
368 Adrenalectomy. *JAMA Surgery.* 2018;153(11):1036-1041.  
369 doi:10.1001/jamasurg.2018.2648
- 370 19. Shah A, Memon M, Kay J, Wood TJ, Tushinski DM, Khanna V. Preoperative  
371 Patient Factors Affecting Length of Stay following Total Knee Arthroplasty: A  
372 Systematic Review and Meta-Analysis. *The Journal of Arthroplasty.* 2019;34(9):2124-  
373 2165.e1. doi:10.1016/j.arth.2019.04.048
- 374 20. Grant RW, McCloskey J, Hatfield M, et al. Use of Latent Class Analysis and k-  
375 Means Clustering to Identify Complex Patient Profiles. *JAMA Network Open.*  
376 2020;3(12):e2029068. doi:10.1001/jamanetworkopen.2020.29068
- 377 21. Smeets RGM, Elissen AMJ, Kroese MEAL, Hameleers N, Ruwaard D. Identifying  
378 subgroups of high-need, high-cost, chronically ill patients in primary care: A latent  
379 class analysis. *PLOS ONE.* 2020;15(1):e0228103. doi:10.1371/journal.pone.0228103
- 380 22. Vermunt JK, Magidson J. Latent Class Cluster Analysis. In: McCutcheon AL,  
381 Hagenars JA, eds. *Applied Latent Class Analysis.* Cambridge University Press;  
382 2002:89-106. doi:10.1017/CBO9780511499531.004
- 383 23. Mori M, Krumholz HM, Allore HG. Using Latent Class Analysis to Identify Hidden  
384 Clinical Phenotypes. *JAMA.* 2020;324(7):700-701. doi:10.1001/jama.2020.2278

- 385 24. Dandis R, Westeneng JM, Inthout J, et al. Latent Class Analysis to Predict  
386 Outcomes of Early High-Intensity Physical Therapy After Total Knee Arthroplasty,  
387 Based on Longitudinal Trajectories of Walking Speed. *J Orthop Sports Phys Ther.*  
388 2021;51(7):362-371. doi:10.2519/jospt.2021.10299
- 389 25. Ulbricht CM, Chrysanthopoulou SA, Levin L, Lapane KL. The use of latent class  
390 analysis for identifying subtypes of depression: A systematic review. *Psychiatry*  
391 *Research.* 2018;266:228-246. doi:10.1016/j.psychres.2018.03.003
- 392 26. Neumann M, Wirtz M, Ernstmann N, et al. Identifying and predicting subgroups of  
393 information needs among cancer patients: an initial study using latent class analysis.  
394 *Support Care Cancer.* 2011;19(8):1197-1209. doi:10.1007/s00520-010-0939-1
- 395 27. Statement on ASA Physical Status Classification System. American Society of  
396 Anesthesiologists. Accessed April 23, 2024. <https://www.asahq.org/standards-and-practice-parameters/statement-on-asa-physical-status-classification-system>
- 398 28. He Y, Li LW, Hao Y, et al. Assessment of predictive validity and feasibility of  
399 Edmonton Frail Scale in identifying postoperative complications among elderly  
400 patients: a prospective observational study. *Sci Rep.* 2020;10(1):14682.  
401 doi:10.1038/s41598-020-71140-5
- 402 29. Rolfson DB, Majumdar SR, Tsuyuki RT, Tahir A, Rockwood K. Validity and  
403 reliability of the Edmonton Frail Scale. *Age Ageing.* 2006;35(5):526-529.  
404 doi:10.1093/ageing/af1041
- 405 30. Tevald MA, Clancy MJ, Butler K, Drollinger M, Adler J, Malone D. AM-PAC “6-  
406 Clicks” for the Prediction of Short Term Clinical Outcomes in Individuals Hospitalized  
407 with COVID-19: A Retrospective Cohort Study. *Archives of Physical Medicine and*  
408 *Rehabilitation.* 2021;0(0). doi:10.1016/j.apmr.2021.08.006
- 409 31. Hull BL, Thut MC. A Simple Tool Using AM-PAC “6-Clicks” to Measure Value  
410 Added in Acute Care Physical Therapy: The Therapy Value Quotient. *Journal of*  
411 *Acute Care Physical Therapy.* 2018;9(4):155-162.  
412 doi:10.1097/JAT.0000000000000082
- 413 32. Haley SM, Coster WJ, Andres PL, Kosinski M, Ni P. Score comparability of short  
414 forms and computerized adaptive testing: simulation study with the activity measure  
415 for post-acute care 1. *Archives of Physical Medicine and Rehabilitation.*  
416 2004;85(4):661-666. doi:10.1016/j.apmr.2003.08.097
- 417 33. Jette D, Stilphen M, Ranganathan VK, Passek S, Frost FS, Jette AM. Interrater  
418 Reliability of AM-PAC “6-Clicks” Basic Mobility and Daily Activity Short Forms.  
419 *Physical therapy.* 2015;95(5):758-766. doi:10.2522/ptj.20140174
- 420 34. Hoyer EH, Young DL, Klein LM, et al. Toward a Common Language for  
421 Measuring Patient Mobility in the Hospital: Reliability and Construct Validity of

- 422 interprofessional Mobility Measures. *Phys Ther*. Published online November 2, 2017.  
423 doi:10.1093/ptj/pzx110
- 424 35. Linda K. Muthen, Bengt O. Muthen. *Mplus User's Guide*. Eighth. Muthen &  
425 Muthen
- 426 36. Nylund KL, Asparouhov T, Muthén BO. Deciding on the Number of Classes in  
427 Latent Class Analysis and Growth Mixture Modeling: A Monte Carlo Simulation  
428 Study. *Structural Equation Modeling: A Multidisciplinary Journal*. 2007;14(4):535-569.  
429 doi:10.1080/10705510701575396
- 430 37. Asparouhov, T, Muthén, B. Auxiliary variables in mixture modeling: Using the  
431 BCH method in Mplus to estimate a distal outcome model and an arbitrary secondary  
432 model. 2016. Accessed April 26, 2024. <https://www.statmodel.com/example/webnotes/webnote21.pdf>.  
433
- 434 38. Boonen A, Maksymowych WP. Measurement: function and mobility (focussing on  
435 the ICF framework). *Best Pract Res Clin Rheumatol*. 2010;24(5):605-624.  
436 doi:10.1016/j.berh.2010.05.008
- 437 39. Menendez ME, Schumacher CS, Ring D, Freiberg AA, Rubash HE, Kwon YM.  
438 Does "6-Clicks" Day 1 Postoperative Mobility Score Predict Discharge Disposition  
439 After Total Hip and Knee Arthroplasties? *The Journal of Arthroplasty*.  
440 2016;31(9):1916-1920. doi:10.1016/j.arth.2016.02.017
- 441 40. Blackwood J, Fernandez N. AM-PAC 6-Clicks Scores Predict Hospital Discharge  
442 Destination In Older Adults With Cardiovascular Disease (poster). *Innov Aging*.  
443 2018;2(Suppl 1):489. doi:10.1093/geroni/igy023.1824
- 444 41. McLaughlin KH, Friedman M, Hoyer EH, et al. The Johns Hopkins Activity and  
445 Mobility Promotion Program: A Framework to Increase Activity and Mobility Among  
446 Hospitalized Patients. *Journal of Nursing Care Quality*. 2023;38(2):164.  
447 doi:10.1097/NCQ.0000000000000678
- 448 42. Capo-Lugo CE, McLaughlin KH, Ye B, et al. Using Nursing Assessments of  
449 Mobility and Activity to Prioritize Patients Most Likely to Need Rehabilitation Services.  
450 *Archives of Physical Medicine and Rehabilitation*. 2023;104(9):1402-1408.  
451 doi:10.1016/j.apmr.2023.03.018
- 452 43. Bull C, Teede H, Watson D, Callander EJ. Selecting and Implementing Patient-  
453 Reported Outcome and Experience Measures to Assess Health System  
454 Performance. *JAMA Health Forum*. 2022;3(4):e220326.  
455 doi:10.1001/jamahealthforum.2022.0326
- 456 44. Franklin P, Chenok K, Lavalee D, et al. Framework To Guide The Collection And  
457 Use Of Patient-Reported Outcome Measures In The Learning Healthcare System.  
458 *EGEMS (Wash DC)*. 5(1):17. doi:10.5334/egems.227

- 459 45. Delanois RE, Tarazi JM, Wilkie WA, et al. Social determinants of health in total  
460 knee arthroplasty: are social factors associated with increased 30-day post-discharge  
461 cost of care and length of stay? *The Bone & Joint Journal*. 2021;103-B(6 Supple  
462 A):113-118. doi:10.1302/0301-620X.103B6.BJJ-2020-2430.R1
- 463 46. Segar MW, Keshvani N, Rao S, Fonarow GC, Das SR, Pandey A. Race, Social  
464 Determinants of Health, and Length of Stay Among Hospitalized Patients With Heart  
465 Failure: An Analysis From the Get With The Guidelines-Heart Failure Registry.  
466 *Circulation: Heart Failure*. 2022;15(11):e009401.  
467 doi:10.1161/CIRCHEARTFAILURE.121.009401
- 468 47. Nguyen TA, Page A, Aggarwal A, Henke P. Social Determinants of Discharge  
469 Destination for Patients After Stroke With Low Admission FIM Instrument Scores.  
470 *Archives of Physical Medicine and Rehabilitation*. 2007;88(6):740-744.  
471 doi:10.1016/j.apmr.2007.03.011
- 472 48. Beeler PE, Cheetham M, Held U, Battegay E. Depression is independently  
473 associated with increased length of stay and readmissions in multimorbid inpatients.  
474 *European Journal of Internal Medicine*. 2020;73:59-66.  
475 doi:10.1016/j.ejim.2019.11.012
- 476 49. Oh C, Gold H, Slover J. Diagnosis of depression and other patient factors  
477 impacts length of stay after total knee arthroplasty. *Arthroplasty Today*. 2020;6(1):77-  
478 80. doi:10.1016/j.artd.2019.11.010

479

480

481 **Table 1. Cohort Description**

|                                         |             |
|-----------------------------------------|-------------|
| <b>Age, mean (SD)</b>                   | 73.0 (5.9)  |
| <b>Female, No. (%)</b>                  | 917 (45.0)  |
| <b>Race, No. (%)</b>                    |             |
| White                                   | 1559 (76.6) |
| Black                                   | 328 (16.1)  |
| Asian                                   | 70 (3.4)    |
| Other                                   | 79 (3.9)    |
| <b>Ethnicity, No. (%)</b>               |             |
| Hispanic                                | 46 (2.3)    |
| Non-Hispanic                            | 1973 (96.9) |
| Other/unknown                           | 17 (0.8)    |
| <b>Length of stay (days), mean (SD)</b> | 4.4 (4.4)   |
| <b>Surgical specialty, No. (%)</b>      |             |
| Abdominal                               | 432 (21.2)  |
| Gynecology                              | 89 (4.4)    |
| Hepatobiliary/pancreatic                | 239 (11.7)  |
| Head and neck                           | 59 (2.9)    |
| Neurosurgery                            | 194 (9.5)   |
| Orthopaedics                            | 100 (4.9)   |
| Plastics                                | 65 (3.2)    |
| Spine                                   | 287 (14.1)  |
| Thoracic                                | 99 (4.9)    |
| Urology                                 | 414 (20.3)  |
| Vascular                                | 58 (2.8)    |
| <b>Total, No.</b>                       | 2036        |

482

483

484 **Table 2. Fit Indices for Latent Class Models**

| # Classes | LL-value | # of free Parameters | BIC   | aBIC  | VLMR-LRT | VLMR-LRT <i>p value</i> | Entropy | Smallest class n (%) |
|-----------|----------|----------------------|-------|-------|----------|-------------------------|---------|----------------------|
| 1         | -30253   | 12                   | 60597 | 60559 | ---      | ---                     | ---     | ---                  |
| 2         | -29179   | 21                   | 58518 | 58452 | 2147.6   | 0.00                    | 0.80    | 630 (30.9)           |
| 3         | -28718   | 30                   | 57664 | 57568 | 923.2    | 0.00                    | 0.83    | 311 (15.3)           |
| 4         | -28319   | 39                   | 56936 | 56812 | 796.3    | 0.00                    | 0.88    | 57 (2.8)             |
| 5         | -28108   | 48                   | 56583 | 56430 | 421.9    | 0.00                    | 0.84    | 48 (2.3)             |
| 6         | -27935   | 57                   | 56305 | 56124 | 346.00   | 0.40                    | 0.85    | 34 (1.7)             |
| 7         | -27808   | 66                   | 56119 | 55910 | 254.34   | 0.12                    | 0.85    | 34 (1.7)             |
| 8         | -27706   | 75                   | 55983 | 55745 | 204.98   | 0.15                    | 0.85    | 33 (1.6)             |

LL-value = Log-likelihood value. BIC = Bayesian information criterion. aBIC = sample size adjusted BIC. VLMR-LRT = Veong Lo-Mendell-Rubin likelihood ratio test. VLMR-LRT and entropy are not applicable for the 1-class model.

485

486

|                          | <b>Low Frailty-High Mobility<br/>(15.3%)</b>      | <b>High Frailty-Low Mobility<br/>(27.6%)</b> | <b>Low Frailty-Low Mobility<br/>(57.1%)</b> |             |
|--------------------------|---------------------------------------------------|----------------------------------------------|---------------------------------------------|-------------|
| <b>Class Indicators</b>  | Age                                               | 71.59                                        | 75.03                                       | 72.46       |
|                          | EFS Total Score, mean                             | 2.57                                         | 6.46                                        | 2.20        |
|                          | AMPAC Mobility t-score, mean                      | 54.24                                        | 37.68                                       | 41.59       |
|                          | AMPAC Daily activity t-score, mean                | 54.78                                        | 37.53                                       | 40.68       |
|                          | ASA Rating 1-2, (%)                               | 0.36                                         | 0.13                                        | 0.33        |
|                          | ASA Rating 3-4, (%)                               | 0.64                                         | 0.87                                        | 0.67        |
|                          | Health status -0, (%)                             | 0.75                                         | 0.27                                        | 0.79        |
|                          | Health status -1-2, (%)                           | 0.25                                         | 0.73                                        | 0.21        |
|                          | Functional dependence -0, (%)                     | 0.96                                         | 0.49                                        | 0.98        |
|                          | Functional dependence -1-2, (%)                   | 0.05                                         | 0.51                                        | 0.02        |
|                          | Functional performance -0, (%)                    | 0.70                                         | 0.15                                        | 0.74        |
|                          | Functional performance -1-2, (%)                  | 0.30                                         | 0.85                                        | 0.26        |
| <b>Hospital Outcomes</b> | Discharge to home, % (SE)                         | 99 (1)†                                      | 77 (2)†                                     | 96 (1)†     |
|                          | Extended length of stay*, % (SE)                  | 6 (2)†                                       | 27 (2)†                                     | 18 (1)†     |
|                          | Physical therapy visits (per week), mean (SE)     | 0.3 (0.07)†                                  | 2.1 (0.10)†                                 | 1.2 (0.06)† |
|                          | Occupational therapy visits (per week), mean (SE) | 0.1 (0.04)†                                  | 1.1 (0.07)†                                 | 0.5 (0.04)† |

487 **Table 3: Description of Identified Classes and Outcomes of Class Membership (N=2036)**

488 N=2,036.

489 *Note:* For categorical hospital outcomes, values by class represent proportions. For continuous  
490 outcomes values represent means.

491 †Significantly different compared to other classes in row ( $p < 0.001$ )

492 \*Represents a length of stay  $\geq 1$  SD above mean length of stay (days), by surgical category

493

494 **Figure 1: Class Membership by Surgical Category**

495

496 HB: hepatobiliary

497



# Percentage of Patients by Class and Specialty

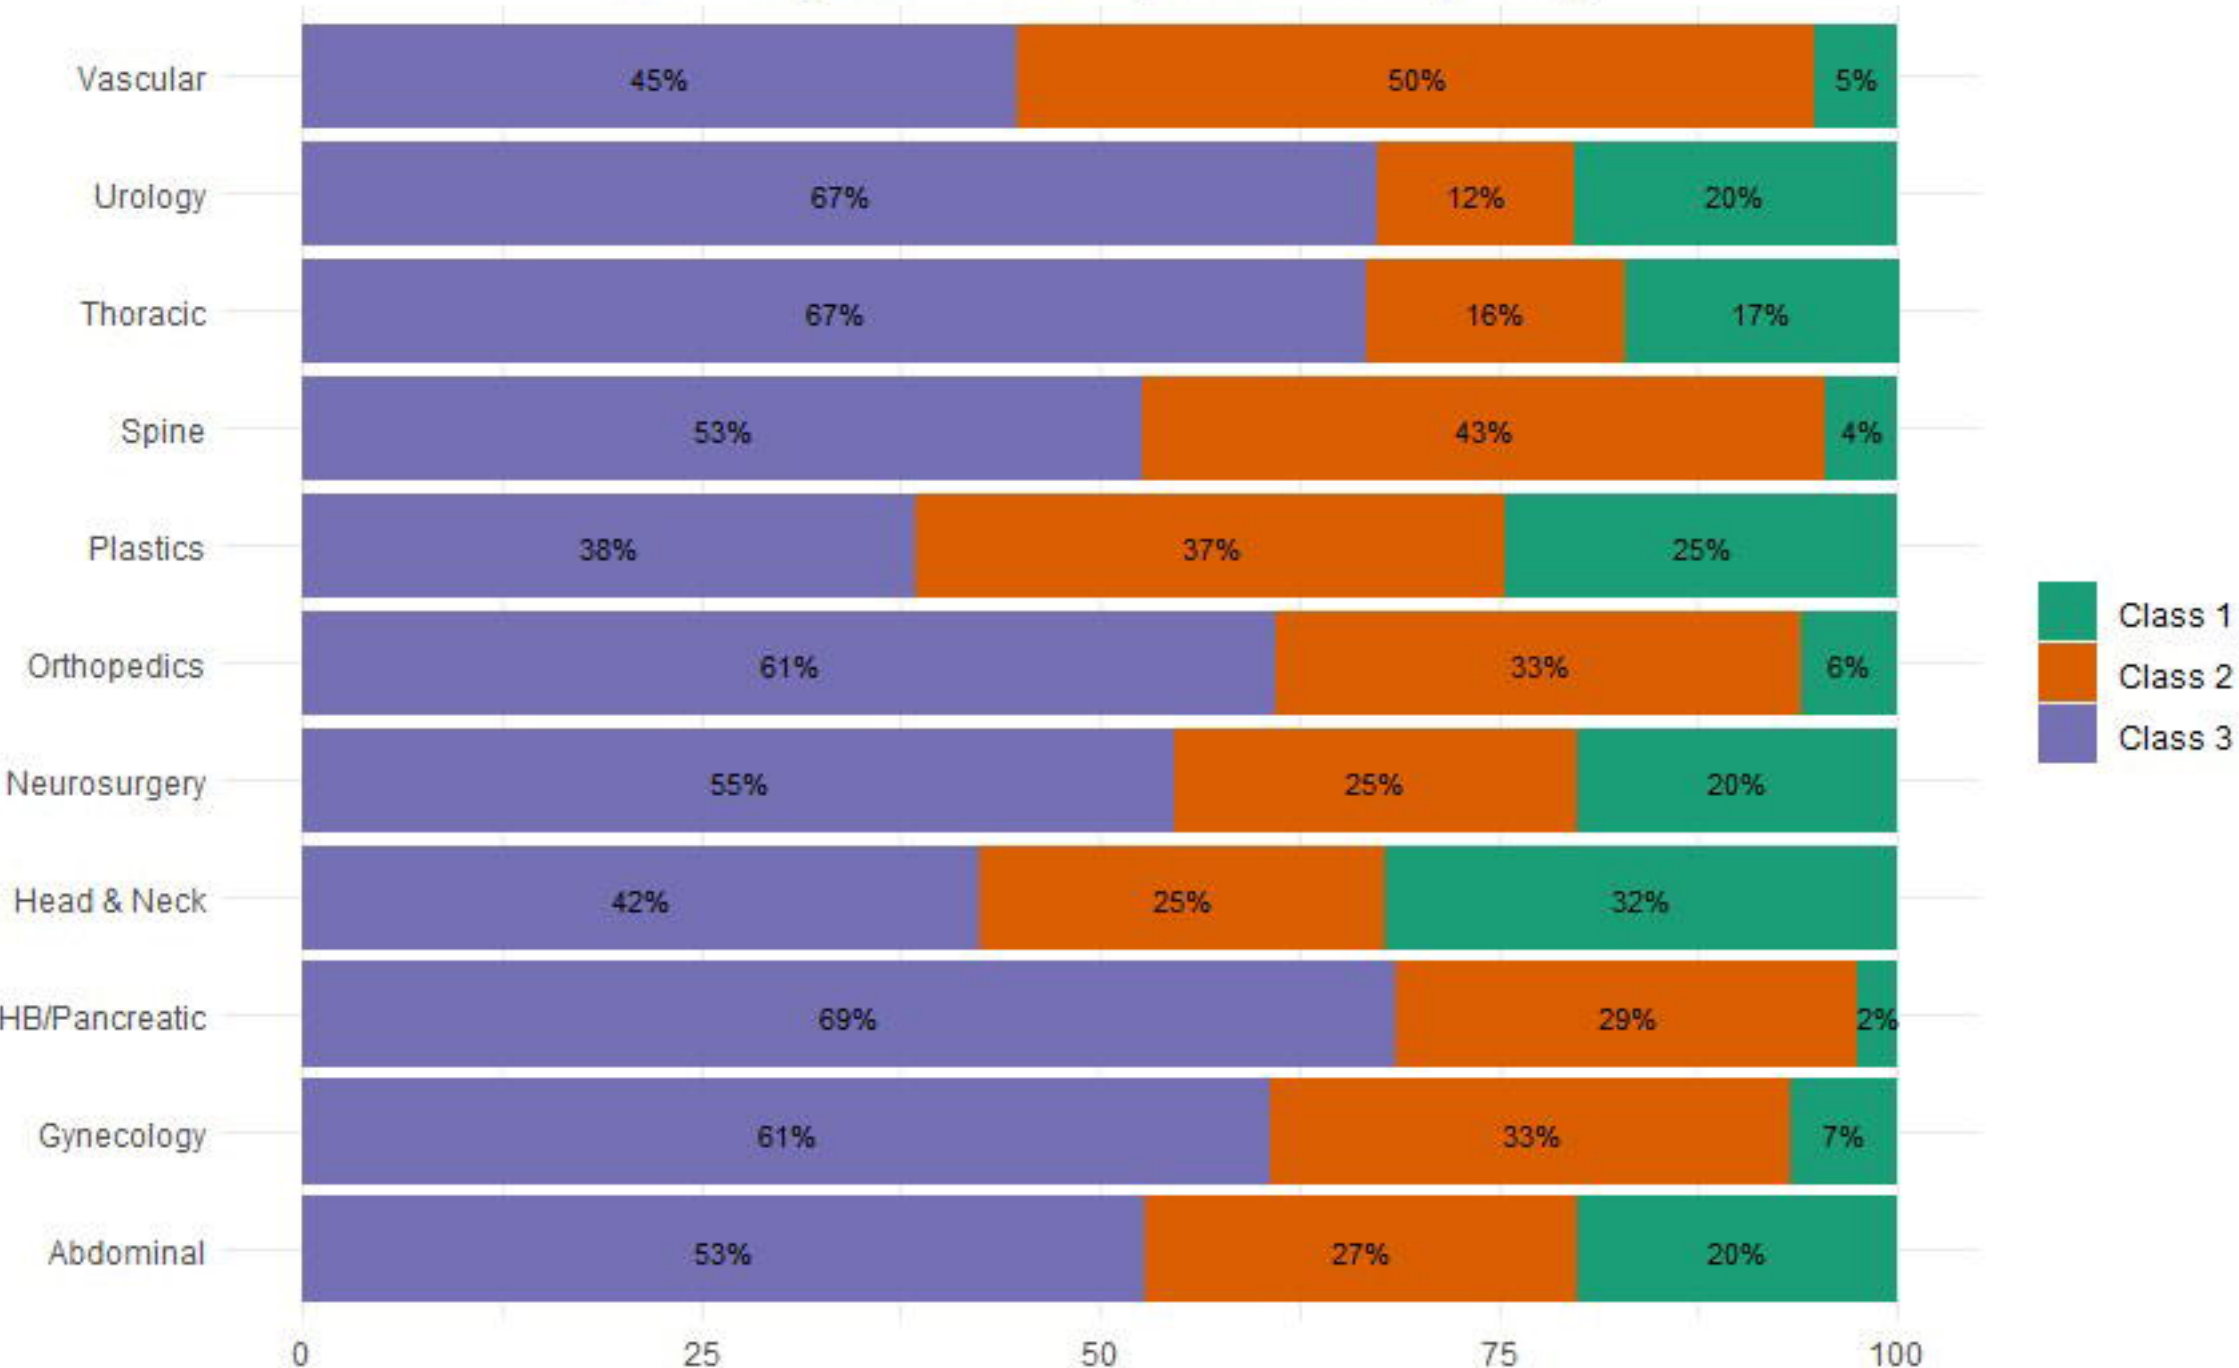

Source: https://medrxiv.org/content/10.1101/2025.01.03.25319954v1.full.pdf
